# Supplementary material
Source: MDPI journal article supplement (https://www.mdpi.com/2073-445X/13/4/548)
Supplement: s1 [file s1]

## Differential\_Calculus\_Basic

```
function [d_dt] = Differential_Calculus_Basic(t, z)
```

```
%% Initialize the variables.
```

```
lambda = 0.25;  
R = 585;  
R_prime = 1100;  
C_E = 250;  
C_L = 320;  
beta = 0.2;  
R_G1 = 40;  
R_G2 = 160;  
C_G1 = 85;  
C_G2 = 25;
```

```
x = z(1);  
y = z(2);
```

```
%% Calculate the anticipated returns.
```

```
W_L1 = y * ((1 - lambda) * (R_prime - C_E - C_L) + beta * C_L) + (1 - y) * (1 - lambda) *  
(R_prime - C_E - C_L);
```

```
W_L2 = (1 - lambda) * R;
```

```
W_L_avg = x * W_L1 + (1 - x) * W_L2;
```

```
W_G1 = x * (lambda * (R_prime - C_E - C_L) + C_L + R_G1 + R_G2 - C_G1 - C_G2) + (1  
- x) * (lambda * R - C_G2);
```

```
W_G2 = x * (lambda * (R_prime - C_E - C_L) + C_L + R_G1) + (1 - x) * lambda * R;
```

```
W_G_avg = y * W_G1 + (1 - y) * W_G2;
```

```
%% Calculate the partial derivatives.
```

```
% dx_dt = x * (1 - x) * ((1 - lambda) * (R_prime - C_E - C_L - R) + y * beta * C_L);
```

```
% dy_dt = y * (1 - y) * (x * (R_G2 - C_G1) - C_G2);
```

```
dx_dt = x * (W_L1 - W_L_avg);
```

```
dy_dt = y * (W_G1 - W_G_avg);
```

```
d_dt = [dx_dt; dy_dt];
```

```
end
```

## Differential\_Calculus\_Extended

```
function [d_dt] = Differential_Calculus_Extended(t, z)

%% Initialize the variables.

lambda = 0.25;
R = 585;
R_prime = 1100;
C_E = 250;
C_L = 320;
beta = 0.2;
R_G1 = 40;
R_G2 = 160;
C_G1 = 85;
C_G2 = 25;
F = 10;

x = z(1);
y = z(2);

%% Calculate the anticipated returns.

W_L1 = y * ((1 - lambda) * (R_prime - C_E - C_L) + beta * C_L) + (1 - y) * (1 - lambda) * (R_prime - C_E - C_L);
W_L2 = y * ((1 - lambda) * R - F) + (1 - y) * (1 - lambda) * R;
W_L_avg = x * W_L1 + (1 - x) * W_L2;

W_G1 = x * (lambda * (R_prime - C_E - C_L) + C_L + R_G1 + R_G2 - C_G1 - C_G2) + (1 - x) * (lambda * R - C_G2 + F);
W_G2 = x * (lambda * (R_prime - C_E - C_L) + C_L + R_G1) + (1 - x) * lambda * R;
W_G_avg = y * W_G1 + (1 - y) * W_G2;

%% Calculate the partial derivatives.

% dx_dt = x * (1 - x) * ((1 - lambda) * (R_prime - C_E - C_L - R) + y * beta * C_L);
% dy_dt = y * (1 - y) * (x * (R_G2 - C_G1) - C_G2);

dx_dt = x * (W_L1 - W_L_avg);
dy_dt = y * (W_G1 - W_G_avg);

d_dt = [dx_dt; dy_dt];

end
```

### Impact of Different Initial Strategies

*y\_0\_0P4*

%% Create a 2-D line plot of the data in Y versus the corresponding values in X.

```
unit = 0.1;  
x_min = 0;  
x_max = 1;  
y_min = 0;  
y_max = 1;
```

```
figure(1);  
set(gcf, 'Units', 'Inches', 'Position', [3 3 5.2 5]);
```

```
color_mat = [ [1 0 0];  
              [1 0.5 0];  
              [1 1 0];  
              [0 1 0];  
              [0 1 1];  
              [0 0.5 1];  
              [0 0 1];  
              [0.5 0 1];  
              [1 0 1];  
            ];
```

```
for ii = unit: unit: 1 - unit
```

```
    for jj = 0.4
```

```
        [T, Y] = ode23tb('Differential_Calculus_Extended', [0, 3], [ii, jj]);
```

```
        color = color_mat(round(ii / unit), :);
```

```
        plot(Y(:,1), Y(:,2), 'Color', color, 'LineWidth', 2);
```

```
        hold on;
```

```
    end
```

```
end
```

```
% [A, B] = Equilibrium_Calc();  
%  
% scatter(A, B, 5, 'filled', 'red');  
%
```

```

% hold on;

legend( '\it{x}}_{0} = 0.1', ...
        '\it{x}}_{0} = 0.2', ...
        '\it{x}}_{0} = 0.3', ...
        '\it{x}}_{0} = 0.4', ...
        '\it{x}}_{0} = 0.5', ...
        '\it{x}}_{0} = 0.6', ...
        '\it{x}}_{0} = 0.7', ...
        '\it{x}}_{0} = 0.8', ...
        '\it{x}}_{0} = 0.9', ...
        'NumColumns', 2, ...
        'FontSize', 12, ...
        'Location', 'SouthEast');

set(gca, 'FontSize', 14, 'FontName', 'Cambria');
set(gca, 'FontSize', 14, 'FontName', 'Times New Roman');

xlabel('x','FontSize', 16, 'FontWeight', 'light', 'FontName', 'Times New Roman Italic');
ylabel('y','FontSize', 16, 'FontWeight', 'light', 'FontName', 'Times New Roman Italic');

xlim([x_min, x_max]);
ylim([y_min, y_max]);

xticks(0: x_max / 5 :x_max);
yticks(0: y_max / 5 :y_max);

grid on;


$$y_{0\_0P7}$$


%% Create a 2-D line plot of the data in Y versus the corresponding values in X.

unit = 0.1;
x_min = 0;
x_max = 1;
y_min = 0;
y_max = 1;

figure(1);
set(gcf, 'Units', 'Inches', 'Position', [3 3 5.2 5]);

color_mat = [ 1 0 0 ];
              [1 0.5 0 ];
              [1 1 0 ];
              [0 1 0 ];

```

```

        [0  1  1  ];
        [0  0.5 1  ];
        [0  0  1  ];
        [0.5 0  1  ];
        [1  0  1  ];
    ];

    for ii = unit: unit: 1 - unit

        for jj = 0.7

            [T, Y] = ode23tb('Differential_Calculus_Extended', [0, 3], [ii, jj]);

            color = color_mat(round(ii / unit), :);

            plot(Y(:,1), Y(:,2), 'Color', color, 'LineWidth', 2);

            hold on;

        end

    end

end

% [A, B] = Equilibrium_Calc();
%
% scatter(A, B, 5, 'filled', 'red');
%
% hold on;

legend( '\it{x}}_{0} = 0.1', ...
        '\it{x}}_{0} = 0.2', ...
        '\it{x}}_{0} = 0.3', ...
        '\it{x}}_{0} = 0.4', ...
        '\it{x}}_{0} = 0.5', ...
        '\it{x}}_{0} = 0.6', ...
        '\it{x}}_{0} = 0.7', ...
        '\it{x}}_{0} = 0.8', ...
        '\it{x}}_{0} = 0.9', ...
        'NumColumns', 2, ...
        'FontSize', 12, ...
        'Location', 'SouthEast');

set(gca, 'FontSize', 14, 'FontName', 'Cambria');
set(gca, 'FontSize', 14, 'FontName', 'Times New Roman');

```

```
xlabel('x','FontSize', 16, 'FontWeight', 'light', 'FontName', 'Times New Roman Italic');
ylabel('y','FontSize', 16, 'FontWeight', 'light', 'FontName', 'Times New Roman Italic');
```

```
xlim([x_min, x_max]);
ylim([y_min, y_max]);
```

```
xticks(0: x_max / 5 :x_max);
yticks(0: y_max / 5 :y_max);
```

```
grid on;
```

### **Impact\_Beta**

#### *Differential\_Calculus\_Extended*

```
function [d_dt] = Differential_Calculus_Extended(t, z)
```

```
%% Initialize the variables.
```

```
lambda = 0.25;
R = 585;
R_prime = 1100;
C_E = 250;
C_L = 320;
% beta = 0.2;
R_G1 = 40;
R_G2 = 160;
C_G1 = 85;
C_G2 = 25;
F = 10;
```

```
global beta;
```

```
x = z(1);
y = z(2);
```

```
%% Calculate the anticipated returns.
```

```
W_L1 = y * ((1 - lambda) * (R_prime - C_E - C_L) + beta * C_L) + (1 - y) * (1 - lambda) *
(R_prime - C_E - C_L);
```

```
W_L2 = y * ((1 - lambda) * R - F) + (1 - y) * (1 - lambda) * R;
```

```
W_L_avg = x * W_L1 + (1 - x) * W_L2;
```

```
W_G1 = x * (lambda * (R_prime - C_E - C_L) + C_L + R_G1 + R_G2 - C_G1 - C_G2) + (1
```

```

- x) * (lambda * R - C_G2 + F);
W_G2 = x * (lambda * (R_prime - C_E - C_L) + C_L + R_G1) + (1 - x) * lambda * R;
W_G_avg = y * W_G1 + (1 - y) * W_G2;

%% Calculate the partial derivatives.

%      dx_dt = x * (1 - x) * ((1 - lambda) * (R_prime - C_E - C_L - R) + y * beta * C_L);
%      dy_dt = y * (1 - y) * (x * (R_G2 - C_G1) - C_G2);

dx_dt = x * (W_L1 - W_L_avg);
dy_dt = y * (W_G1 - W_G_avg);

d_dt = [dx_dt; dy_dt];

end

```

### *Main\_Function*

%% Create a 2-D line plot of the data in Y versus the corresponding values in X.

```

unit = 0.1;
x_min = 0;
x_max = 0.4;
y_min = 0.4;
y_max = 1;

figure(1);
set(gcf, 'Units', 'Inches', 'Position', [3 3 5 3.5]);

color_mat = [
    [1  0  0  ];
    [1  0.5 0  ];
    [1  1  0  ];
    [0  1  0  ];
    [0  0.5 1  ];
    [0  0  1  ];
    [0.5 0  1  ];
    [1  0  1  ];
];

global beta;

beta_min = 0.16;
beta_max = 0.24;
beta_unit = 0.02;

```

```

for beta = beta_min : beta_unit : beta_max

    for ii = 0.5

        for jj = 0.5

            [T, Y] = ode23tb('Differential_Calculus_Extended', [0, 0.4], [ii, jj]);

            color = color_mat(round((beta - beta_min) / beta_unit + 1), :);

            plot(T, Y(:,1), 'Color', color, 'LineWidth', 2);

            hold on;

        end

    end

end

end

% [A, B] = Equilibrium_Calc();
%
% scatter(A, B, 5, 'filled', 'red');
%
% hold on;

legend( '\it{\beta} = 0.16', ...
        '\it{\beta} = 0.18', ...
        '\it{\beta} = 0.20', ...
        '\it{\beta} = 0.22', ...
        '\it{\beta} = 0.24', ...
        'NumColumns', 1, ...
        'FontSize', 12, ...
        'Location', 'East');

set(gca, 'FontSize', 14, 'FontName', 'Cambria');
set(gca, 'FontSize', 14, 'FontName', 'Times New Roman');

xlabel('t', 'FontSize', 16, 'FontWeight', 'light', 'FontName', 'Times New Roman Italic');
ylabel('x', 'FontSize', 16, 'FontWeight', 'light', 'FontName', 'Times New Roman Italic');

xlim([x_min, x_max]);
ylim([y_min, y_max]);

```



```

xticks(0: x_max / 5 :x_max);
yticks(0: y_max / 5 :y_max);

grid on;

figure(2);
set(gcf, 'Units', 'Inches', 'Position', [3 3 5 3.5]);

color_mat = [  [1  0  0  ];
                [1  0.5 0  ];
                [1  1  0  ];
                [0  1  0  ];
                [0  0.5 1  ];
                [0  0  1  ];
                [0.5 0  1  ];
                [1  0  1  ];
                ];

for beta = beta_min : beta_unit : beta_max

    for ii = 0.5

        for jj = 0.5

            [T, Y] = ode23tb('Differential_Calculus_Extended', [0, 0.4], [ii, jj]);

            color = color_mat(round((beta - beta_min) / beta_unit + 1), :);

            plot(T, Y(:,2), 'Color', color, 'LineWidth', 2);

            hold on;

        end

    end

end

end

% [A, B] = Equilibrium_Calc();
%
% scatter(A, B, 5, 'filled', 'red');
%
% hold on;

```

```

legend( '\it{\beta} = 0.16', ...
        '\it{\beta} = 0.18', ...
        '\it{\beta} = 0.20', ...
        '\it{\beta} = 0.22', ...
        '\it{\beta} = 0.24', ...
        'NumColumns', 1, ...
        'FontSize', 12, ...
        'Location', 'East');

```

```

set(gca, 'FontSize', 14, 'FontName', 'Cambria');
set(gca, 'FontSize', 14, 'FontName', 'Times New Roman');

```

```

xlabel('t','FontSize', 16, 'FontWeight', 'light', 'FontName', 'Times New Roman Italic');
ylabel('y','FontSize', 16, 'FontWeight', 'light', 'FontName', 'Times New Roman Italic');

```

```

xlim([x_min, x_max]);
ylim([y_min, y_max]);

```

```

xticks(0: x_max / 5 :x_max);
yticks(0: y_max / 5 :y_max);

```

```

grid on;

```

### **Impact\_C\_E**

*Differential\_Calculus\_Extended*

```

function [d_dt] = Differential_Calculus_Extended(t, z)

```

```

    %% Initialize the variables.

```

```

    lambda = 0.25;
    R = 585;
    R_prime = 1100;
%    C_E = 250;
    C_L = 320;
    beta = 0.2;
    R_G1 = 40;
    R_G2 = 160;
    C_G1 = 85;
    C_G2 = 25;
    F = 10;

```

```

    global C_E;

```

```

x = z(1);
y = z(2);

%% Calculate the anticipated returns.

W_L1 = y * ((1 - lambda) * (R_prime - C_E - C_L) + beta * C_L) + (1 - y) * (1 - lambda) *
(R_prime - C_E - C_L);
W_L2 = y * ((1 - lambda) * R - F) + (1 - y) * (1 - lambda) * R;
W_L_avg = x * W_L1 + (1 - x) * W_L2;

W_G1 = x * (lambda * (R_prime - C_E - C_L) + C_L + R_G1 + R_G2 - C_G1 - C_G2) + (1
- x) * (lambda * R - C_G2 + F);
W_G2 = x * (lambda * (R_prime - C_E - C_L) + C_L + R_G1) + (1 - x) * lambda * R;
W_G_avg = y * W_G1 + (1 - y) * W_G2;

%% Calculate the partial derivatives.

%   dx_dt = x * (1 - x) * ((1 - lambda) * (R_prime - C_E - C_L - R) + y * beta * C_L);
%   dy_dt = y * (1 - y) * (x * (R_G2 - C_G1) - C_G2);

dx_dt = x * (W_L1 - W_L_avg);
dy_dt = y * (W_G1 - W_G_avg);

d_dt = [dx_dt; dy_dt];

end

Main_Function

%% Create a 2-D line plot of the data in Y versus the corresponding values in X.

unit = 0.1;
x_min = 0;
x_max = 0.4;
y_min = 0;
y_max = 1;

figure(1);
set(gcf, 'Units', 'Inches', 'Position', [3 3 5 3.5]);

color_mat = [  [1  0  0  ];
               [1  0.5 0  ];
               [1  1  0  ];
               [0  1  0  ];
               [0  0.5 1  ];
               [0  0  1  ]];

```

```

        [0.5 0   1   ];
        [1   0   1   ];
    ];

global C_E;

C_E_min = 170;
C_E_max = 330;
C_E_unit = 40;

for C_E = C_E_min : C_E_unit : C_E_max

    for ii = 0.5

        for jj = 0.5

            [T, Y] = ode23tb('Differential_Calculus_Extended', [0, 0.4], [ii, jj]);

            color = color_mat(round((C_E - C_E_min) / C_E_unit + 1), :);

            plot(T, Y(:,1), 'Color', color, 'LineWidth', 2);

            hold on;

        end

    end

end

end

% [A, B] = Equilibrium_Calc();
%
% scatter(A, B, 5, 'filled', 'red');
%
% hold on;

legend( '\it{C}_E = 170', ...
        '\it{C}_E = 210', ...
        '\it{C}_E = 250', ...
        '\it{C}_E = 290', ...
        '\it{C}_E = 330', ...
        'NumColumns', 1, ...
        'FontSize', 12, ...

```

```

        'Location', 'East');

set(gca, 'FontSize', 14, 'FontName', 'Cambria');
set(gca, 'FontSize', 14, 'FontName', 'Times New Roman');

xlabel('t','FontSize', 16, 'FontWeight', 'light', 'FontName', 'Times New Roman Italic');
ylabel('x','FontSize', 16, 'FontWeight', 'light', 'FontName', 'Times New Roman Italic');

xlim([x_min, x_max]);
ylim([y_min, y_max]);

xticks(0: x_max / 5 :x_max);
yticks(0: y_max / 5 :y_max);

grid on;

figure(2);
set(gcf, 'Units', 'Inches', 'Position', [3 3 5 3.5]);

color_mat = [    [1    0    0   ];
                  [1    0.5 0   ];
                  [1    1    0   ];
                  [0    1    0   ];
                  [0    0.5 1   ];
                  [0    0    1   ];
                  [0.5 0    1   ];
                  [1    0    1   ];
                  ];

for C_E = C_E_min : C_E_unit : C_E_max

    for ii = 0.5

        for jj = 0.5

            [T, Y] = ode23tb('Differential_Calculus_Extended', [0, 0.4], [ii, jj]);

            color = color_mat(round((C_E - C_E_min) / C_E_unit + 1), :);

            plot(T, Y(:,2), 'Color', color, 'LineWidth', 2);

            hold on;

        end
    end
end

```

```

end

end

% [A, B] = Equilibrium_Calc();
%
% scatter(A, B, 5, 'filled', 'red');
%
% hold on;

legend( '\it{C}}_E = 170', ...
        '\it{C}}_E = 210', ...
        '\it{C}}_E = 250', ...
        '\it{C}}_E = 290', ...
        '\it{C}}_E = 330', ...
        'NumColumns', 1, ...
        'FontSize', 12, ...
        'Location', 'East');

set(gca, 'FontSize', 14, 'FontName', 'Cambria');
set(gca, 'FontSize', 14, 'FontName', 'Times New Roman');

xlabel('t','FontSize', 16, 'FontWeight', 'light', 'FontName', 'Times New Roman Italic');
ylabel('y','FontSize', 16, 'FontWeight', 'light', 'FontName', 'Times New Roman Italic');

xlim([x_min, x_max]);
ylim([y_min, y_max]);

xticks(0: x_max / 5 :x_max);
yticks(0: y_max / 5 :y_max);

grid on;

```

### **Impact\_F**

*Differential\_Calculus\_Extended*

```

function [d_dt] = Differential_Calculus_Extended(t, z)

%% Initialize the variables.

lambda = 0.25;
R = 585;
R_prime = 1100;

```

```

C_E = 250;
C_L = 320;
beta = 0.2;
R_G1 = 40;
R_G2 = 160;
C_G1 = 85;
C_G2 = 25;
%      F = 10;

global F;

x = z(1);
y = z(2);

%% Calculate the anticipated returns.

W_L1 = y * ((1 - lambda) * (R_prime - C_E - C_L) + beta * C_L) + (1 - y) * (1 - lambda) *
(R_prime - C_E - C_L);
W_L2 = y * ((1 - lambda) * R - F) + (1 - y) * (1 - lambda) * R;
W_L_avg = x * W_L1 + (1 - x) * W_L2;

W_G1 = x * (lambda * (R_prime - C_E - C_L) + C_L + R_G1 + R_G2 - C_G1 - C_G2) + (1
- x) * (lambda * R - C_G2 + F);
W_G2 = x * (lambda * (R_prime - C_E - C_L) + C_L + R_G1) + (1 - x) * lambda * R;
W_G_avg = y * W_G1 + (1 - y) * W_G2;

%% Calculate the partial derivatives.

%      dx_dt = x * (1 - x) * ((1 - lambda) * (R_prime - C_E - C_L - R) + y * beta * C_L);
%      dy_dt = y * (1 - y) * (x * (R_G2 - C_G1) - C_G2);

dx_dt = x * (W_L1 - W_L_avg);
dy_dt = y * (W_G1 - W_G_avg);

d_dt = [dx_dt; dy_dt];

end

Main_Function

%% Create a 2-D line plot of the data in Y versus the corresponding values in X.

unit = 0.1;
x_min = 0;
x_max = 0.4;
y_min = 0.4;

```

```

y_max = 1;

figure(1);
set(gcf, 'Units', 'Inches', 'Position', [3 3 5 3.5]);

color_mat = [ [1 0 0];
               [1 0.5 0];
               [1 1 0];
               [0 1 0];
               [0 0.5 1];
               [0 0 1];
               [0.5 0 1];
               [1 0 1];
               ];

global F;

F_min = 6;
F_max = 14;
F_unit = 2;

for F = F_min : F_unit : F_max

    for ii = 0.5

        for jj = 0.5

            [T, Y] = ode23tb('Differential_Calculus_Extended', [0, 0.4], [ii, jj]);

            color = color_mat(round((F - F_min) / F_unit + 1), :);

            plot(T, Y(:,1), 'Color', color, 'LineWidth', 2);

            hold on;

        end

    end

end

end

% [A, B] = Equilibrium_Calc();
%
```



```

% scatter(A, B, 5, 'filled', 'red');
%
% hold on;

legend( '\it{F} = 6', ...
        '\it{F} = 8', ...
        '\it{F} = 10', ...
        '\it{F} = 12', ...
        '\it{F} = 14', ...
        'NumColumns', 1, ...
        'FontSize', 12, ...
        'Location', 'East');

set(gca, 'FontSize', 14, 'FontName', 'Cambria');
set(gca, 'FontSize', 14, 'FontName', 'Times New Roman');

xlabel('t','FontSize', 16, 'FontWeight', 'light', 'FontName', 'Times New Roman Italic');
ylabel('x','FontSize', 16, 'FontWeight', 'light', 'FontName', 'Times New Roman Italic');

xlim([x_min, x_max]);
ylim([y_min, y_max]);

xticks(0: x_max / 5 :x_max);
yticks(0: y_max / 5 :y_max);

grid on;

figure(2);
set(gcf, 'Units', 'Inches', 'Position', [3 3 5 3.5]);

color_mat = [  [1  0  0  ];
                [1  0.5 0  ];
                [1  1  0  ];
                [0  1  0  ];
                [0  0.5 1  ];
                [0  0  1  ];
                [0.5 0  1  ];
                [1  0  1  ];
                ];

for F = F_min : F_unit : F_max

    for ii = 0.5

```

```

for jj = 0.5

    [T, Y] = ode23tb('Differential_Calculus_Extended', [0, 0.4], [ii, jj]);

    color = color_mat(round((F - F_min) / F_unit + 1), :);

    plot(T, Y(:,2), 'Color', color, 'LineWidth', 2);

    hold on;

end

end

end

% [A, B] = Equilibrium_Calc();
%
% scatter(A, B, 5, 'filled', 'red');
%
% hold on;

legend( '\it{F} = 6', ...
        '\it{F} = 8', ...
        '\it{F} = 10', ...
        '\it{F} = 12', ...
        '\it{F} = 14', ...
        'NumColumns', 1, ...
        'FontSize', 12, ...
        'Location', 'East');

set(gca, 'FontSize', 14, 'FontName', 'Cambria');
set(gca, 'FontSize', 14, 'FontName', 'Times New Roman');

xlabel('t', 'FontSize', 16, 'FontWeight', 'light', 'FontName', 'Times New Roman Italic');
ylabel('y', 'FontSize', 16, 'FontWeight', 'light', 'FontName', 'Times New Roman Italic');

xlim([x_min, x_max]);
ylim([y_min, y_max]);

xticks(0: x_max / 5 : x_max);
yticks(0: y_max / 5 : y_max);

grid on;

```

**Impact\_R**  
*Differential\_Calculus\_Extended*

```
function [d_dt] = Differential_Calculus_Extended(t, z)

    %% Initialize the variables.

    lambda = 0.25;
    %      R = 585;
    R_prime = 1100;
    C_E = 250;
    C_L = 320;
    beta = 0.2;
    R_G1 = 40;
    R_G2 = 160;
    C_G1 = 85;
    C_G2 = 25;
    F = 10;

    global R;

    x = z(1);
    y = z(2);

    %% Calculate the anticipated returns.

    W_L1 = y * ((1 - lambda) * (R_prime - C_E - C_L) + beta * C_L) + (1 - y) * (1 - lambda) * (R_prime - C_E - C_L);
    W_L2 = y * ((1 - lambda) * R - F) + (1 - y) * (1 - lambda) * R;
    W_L_avg = x * W_L1 + (1 - x) * W_L2;

    W_G1 = x * (lambda * (R_prime - C_E - C_L) + C_L + R_G1 + R_G2 - C_G1 - C_G2) + (1 - x) * (lambda * R - C_G2 + F);
    W_G2 = x * (lambda * (R_prime - C_E - C_L) + C_L + R_G1) + (1 - x) * lambda * R;
    W_G_avg = y * W_G1 + (1 - y) * W_G2;

    %% Calculate the partial derivatives.

    %      dx_dt = x * (1 - x) * ((1 - lambda) * (R_prime - C_E - C_L - R) + y * beta * C_L);
    %      dy_dt = y * (1 - y) * (x * (R_G2 - C_G1) - C_G2);

    dx_dt = x * (W_L1 - W_L_avg);
    dy_dt = y * (W_G1 - W_G_avg);
```

```

    d_dt = [dx_dt; dy_dt];

end

                                Main_Function

%% Create a 2-D line plot of the data in Y versus the corresponding values in X.

unit = 0.1;
x_min = 0;
x_max = 0.4;
y_min = 0;
y_max = 1;

figure(1);
set(gcf, 'Units', 'Inches', 'Position', [3 3 5 3.5]);

color_mat = [    [1    0    0  ];
                  [1    0.5 0  ];
                  [1    1    0  ];
                  [0    1    0  ];
                  [0    0.5 1  ];
                  [0    0    1  ];
                  [0.5 0    1  ];
                  [1    0    1  ];
                ];

global R;

R_min = 485;
R_max = 685;
R_unit = 50;

for R = R_min : R_unit : R_max

    for ii = 0.5

        for jj = 0.5

            [T, Y] = ode23tb('Differential_Calculus_Extended', [0, 0.4], [ii, jj]);

            color = color_mat(round((R - R_min) / R_unit + 1), :);

            plot(T, Y(:,1), 'Color', color, 'LineWidth', 2);

```

```

        hold on;

    end

end

end

% [A, B] = Equilibrium_Calc();
%
% scatter(A, B, 5, 'filled', 'red');
%
% hold on;

legend( '\it{R} = 485', ...
        '\it{R} = 535', ...
        '\it{R} = 585', ...
        '\it{R} = 635', ...
        '\it{R} = 685', ...
        'NumColumns', 1, ...
        'FontSize', 12, ...
        'Location', 'East');

set(gca, 'FontSize', 14, 'FontName', 'Cambria');
set(gca, 'FontSize', 14, 'FontName', 'Times New Roman');

xlabel('t','FontSize', 16, 'FontWeight', 'light', 'FontName', 'Times New Roman Italic');
ylabel('x','FontSize', 16, 'FontWeight', 'light', 'FontName', 'Times New Roman Italic');

xlim([x_min, x_max]);
ylim([y_min, y_max]);

xticks(0: x_max / 5 :x_max);
yticks(0: y_max / 5 :y_max);

grid on;

figure(2);
set(gcf, 'Units', 'Inches', 'Position', [3 3 5 3.5]);

color_mat = [ 1 0 0 ];
              [1 0.5 0 ];
              [1 1 0 ];
              [0 1 0 ];

```

```

        [0  0.5 1  ];
        [0   0   1  ];
        [0.5 0   1  ];
        [1   0   1  ];
    ];

    for R = R_min : R_unit : R_max

        for ii = 0.5

            for jj = 0.5

                [T, Y] = ode23tb('Differential_Calculus_Extended', [0, 0.4], [ii, jj]);

                color = color_mat(round((R - R_min) / R_unit + 1), :);

                plot(T, Y(:,2), 'Color', color, 'LineWidth', 2);

                hold on;

            end

        end

    end

end

% [A, B] = Equilibrium_Calc();
%
% scatter(A, B, 5, 'filled', 'red');
%
% hold on;

legend( '\it{R} = 485', ...
        '\it{R} = 535', ...
        '\it{R} = 585', ...
        '\it{R} = 635', ...
        '\it{R} = 685', ...
        'NumColumns', 1, ...
        'FontSize', 12, ...
        'Location', 'East');

set(gca, 'FontSize', 14, 'FontName', 'Cambria');
set(gca, 'FontSize', 14, 'FontName', 'Times New Roman');

```

```

xlabel('t','FontSize', 16, 'FontWeight', 'light', 'FontName', 'Times New Roman Italic');
ylabel('y','FontSize', 16, 'FontWeight', 'light', 'FontName', 'Times New Roman Italic');

xlim([x_min, x_max]);
ylim([y_min, y_max]);

xticks(0: x_max / 5 :x_max);
yticks(0: y_max / 5 :y_max);

grid on;

```

### Impact\_R\_prime

*Differential\_Calculus\_Extended*

```

function [d_dt] = Differential_Calculus_Extended(t, z)

%% Initialize the variables.

lambda = 0.25;
R = 585;
% R_prime = 1100;
C_E = 250;
C_L = 320;
beta = 0.2;
R_G1 = 40;
R_G2 = 160;
C_G1 = 85;
C_G2 = 25;
F = 10;

global R_prime;

x = z(1);
y = z(2);

%% Calculate the anticipated returns.

W_L1 = y * ((1 - lambda) * (R_prime - C_E - C_L) + beta * C_L) + (1 - y) * (1 - lambda) *
(R_prime - C_E - C_L);
W_L2 = y * ((1 - lambda) * R - F) + (1 - y) * (1 - lambda) * R;
W_L_avg = x * W_L1 + (1 - x) * W_L2;

W_G1 = x * (lambda * (R_prime - C_E - C_L) + C_L + R_G1 + R_G2 - C_G1 - C_G2) + (1
- x) * (lambda * R - C_G2 + F);

```

```

W_G2 = x * (lambda * (R_prime - C_E - C_L) + C_L + R_G1) + (1 - x) * lambda * R;
W_G_avg = y * W_G1 + (1 - y) * W_G2;

%% Calculate the partial derivatives.

%      dx_dt = x * (1 - x) * ((1 - lambda) * (R_prime - C_E - C_L - R) + y * beta * C_L);
%      dy_dt = y * (1 - y) * (x * (R_G2 - C_G1) - C_G2);

dx_dt = x * (W_L1 - W_L_avg);
dy_dt = y * (W_G1 - W_G_avg);

d_dt = [dx_dt; dy_dt];

end

Main_Function

%% Create a 2-D line plot of the data in Y versus the corresponding values in X.

unit = 0.1;
x_min = 0;
x_max = 0.4;
y_min = 0;
y_max = 1;

figure(1);
set(gcf, 'Units', 'Inches', 'Position', [3 3 5 3.5]);

color_mat = [ 1 0 0 ];
              [1 0.5 0 ];
              [1 1 0 ];
              [0 1 0 ];
              [0 0.5 1 ];
              [0 0 1 ];
              [0.5 0 1 ];
              [1 0 1 ];
              ];

global R_prime;

R_prime_min = 1000;
R_prime_max = 1200;
R_prime_unit = 50;

for R_prime = R_prime_min : R_prime_unit : R_prime_max

```



```

for ii = 0.5

    for jj = 0.5

        [T, Y] = ode23tb('Differential_Calculus_Extended', [0, 0.4], [ii, jj]);

        color = color_mat(round((R_prime - R_prime_min) / R_prime_unit + 1), :);

        plot(T, Y(:,1), 'Color', color, 'LineWidth', 2);

        hold on;

    end

end

end

end

% [A, B] = Equilibrium_Calc();
%
% scatter(A, B, 5, 'filled', 'red');
%
% hold on;

legend( '\it{R}}{\it{}} = 1000', ...
        '\it{R}}{\it{}} = 1050', ...
        '\it{R}}{\it{}} = 1100', ...
        '\it{R}}{\it{}} = 1150', ...
        '\it{R}}{\it{}} = 1200', ...
        'NumColumns', 1, ...
        'FontSize', 12, ...
        'Location', 'East');

set(gca, 'FontSize', 14, 'FontName', 'Cambria');
set(gca, 'FontSize', 14, 'FontName', 'Times New Roman');

xlabel('t', 'FontSize', 16, 'FontWeight', 'light', 'FontName', 'Times New Roman Italic');
ylabel('x', 'FontSize', 16, 'FontWeight', 'light', 'FontName', 'Times New Roman Italic');

xlim([x_min, x_max]);
ylim([y_min, y_max]);

xticks(0: x_max / 5 :x_max);

```

```

yticks(0: y_max / 5 :y_max);

grid on;

figure(2);
set(gcf, 'Units', 'Inches', 'Position', [3 3 5 3.5]);

color_mat = [ 1 0 0 ];
              [1 0.5 0 ];
              [1 1 0 ];
              [0 1 0 ];
              [0 0.5 1 ];
              [0 0 1 ];
              [0.5 0 1 ];
              [1 0 1 ];
              ];

for R_prime = R_prime_min : R_prime_unit : R_prime_max

    for ii = 0.5

        for jj = 0.5

            [T, Y] = ode23tb('Differential_Calculus_Extended', [0, 0.4], [ii, jj]);

            color = color_mat(round((R_prime - R_prime_min) / R_prime_unit + 1), :);

            plot(T, Y(:,2), 'Color', color, 'LineWidth', 2);

            hold on;

        end

    end

end

end

% [A, B] = Equilibrium_Calc();
%
% scatter(A, B, 5, 'filled', 'red');
%
% hold on;

legend( '\it{R}}{\it{"}} = 1000', ...

```

```

        '\it{R}}{\it{}} = 1050', ...
        '\it{R}}{\it{}} = 1100', ...
        '\it{R}}{\it{}} = 1150', ...
        '\it{R}}{\it{}} = 1200', ...
        'NumColumns', 1, ...
        'FontSize', 12, ...
        'Location', 'East');

set(gca, 'FontSize', 14, 'FontName', 'Cambria');
set(gca, 'FontSize', 14, 'FontName', 'Times New Roman');

xlabel('t','FontSize', 16, 'FontWeight', 'light', 'FontName', 'Times New Roman Italic');
ylabel('y','FontSize', 16, 'FontWeight', 'light', 'FontName', 'Times New Roman Italic');

xlim([x_min, x_max]);
ylim([y_min, y_max]);

xticks(0: x_max / 5 :x_max);
yticks(0: y_max / 5 :y_max);

grid on;

```

### Numerical\_Simulation

#### *Differential\_Calculus\_Basic*

```

function [d_dt] = Differential_Calculus_Basic(t, z)

%% Initialize the variables.

lambda = 0.25;
R = 585;
R_prime = 1100;
C_E = 250;
C_L = 320;
beta = 0.2;
R_G1 = 40;
R_G2 = 160;
C_G1 = 85;
C_G2 = 25;

x = z(1);
y = z(2);

%% Calculate the anticipated returns.

```

```

    W_L1 = y * ((1 - lambda) * (R_prime - C_E - C_L) + beta * C_L) + (1 - y) *
(1 - lambda) * (R_prime - C_E - C_L);
    W_L2 = (1 - lambda) * R;
    W_L_avg = x * W_L1 + (1 - x) * W_L2;

    W_G1 = x * (lambda * (R_prime - C_E - C_L) + C_L + R_G1 + R_G2 - C_G1 - C_G2)
+ (1 - x) * (lambda * R - C_G2);
    W_G2 = x * (lambda * (R_prime - C_E - C_L) + C_L + R_G1) + (1 - x) * lambda
* R;
    W_G_avg = y * W_G1 + (1 - y) * W_G2;

    %% Calculate the partial derivatives.

%    dx_dt = x * (1 - x) * ((1 - lambda) * (R_prime - C_E - C_L - R) + y * beta
* C_L);
%    dy_dt = y * (1 - y) * (x * (R_G2 - C_G1) - C_G2);

    dx_dt = x * (W_L1 - W_L_avg);
    dy_dt = y * (W_G1 - W_G_avg);

    d_dt = [dx_dt; dy_dt];

end

```

### *Differential\_Calculus\_Extended*

```

function [d_dt] = Differential_Calculus_Extended(t, z)

    %% Initialize the variables.

    lambda = 0.25;
    R = 585;
    R_prime = 1100;
    C_E = 250;
    C_L = 320;
    beta = 0.2;
    R_G1 = 40;
    R_G2 = 160;
    C_G1 = 85;
    C_G2 = 25;
    F = 10;

    x = z(1);
    y = z(2);

```

```

%% Calculate the anticipated returns.

W_L1 = y * ((1 - lambda) * (R_prime - C_E - C_L) + beta * C_L) + (1 - y) *
(1 - lambda) * (R_prime - C_E - C_L);
W_L2 = y * ((1 - lambda) * R - F) + (1 - y) * (1 - lambda) * R;
W_L_avg = x * W_L1 + (1 - x) * W_L2;

W_G1 = x * (lambda * (R_prime - C_E - C_L) + C_L + R_G1 + R_G2 - C_G1 - C_G2)
+ (1 - x) * (lambda * R - C_G2 + F);
W_G2 = x * (lambda * (R_prime - C_E - C_L) + C_L + R_G1) + (1 - x) * lambda
* R;
W_G_avg = y * W_G1 + (1 - y) * W_G2;

%% Calculate the partial derivatives.

% dx_dt = x * (1 - x) * ((1 - lambda) * (R_prime - C_E - C_L - R) + y * beta
* C_L);
% dy_dt = y * (1 - y) * (x * (R_G2 - C_G1) - C_G2);

dx_dt = x * (W_L1 - W_L_avg);
dy_dt = y * (W_G1 - W_G_avg);

d_dt = [dx_dt; dy_dt];

end

Equilibrium_Calc
function [A, B] = Equilibrium_Calc()

%% Initialize the variables.

lambda = 0.25;
R = 585;
R_prime = 1100;
C_E = 250;
C_L = 320;
beta = 0.2;
R_G1 = 40;
R_G2 = 160;
C_G1 = 85;
C_G2 = 25;

%% Calculate the equilibrium point;

A = C_G2 / (R_G2 - C_G1);

```

```

    B = (1 - lambda) * (R + C_E + C_L - R_prime) / (beta * C_L);

end

                                Main_Function

%% Create a 2-D line plot of the data in Y versus the corresponding values in X
(Basic).

unit = 0.05;
x_min = 0;
x_max = 1;
y_min = 0;
y_max = 1;

figure(1);
set(gcf, 'Units', 'Inches', 'Position', [3 3 5.2 5]);

for ii = unit: unit: 1 - unit

    for jj = unit: unit: 1 - unit

        [T, Y] = ode23tb('Differential_Calculus_Basic', [0, 3], [ii, jj]);

        plot(Y(:,1), Y(:,2), 'Color', 'blue');

        hold on;

    end

end

end

% [A, B] = Equilibrium_Calc();
%
% scatter(A, B, 5, 'filled', 'red');
%
% hold on;

set(gca, 'FontSize', 14, 'FontName', 'Cambria');
set(gca, 'FontSize', 14, 'FontName', 'Times New Roman');

xlabel('x', 'FontSize', 16, 'FontWeight', 'light', 'FontName', 'Times New Roman
Italic');
ylabel('y', 'FontSize', 16, 'FontWeight', 'light', 'FontName', 'Times New Roman
Italic');

```

```

xlim([x_min, x_max]);
ylim([y_min, y_max]);

xticks(0: x_max / 5 :x_max);
yticks(0: y_max / 5 :y_max);

grid on;

%% Create a 2-D line plot of the data in Y versus the corresponding values in X
(Extended).

unit = 0.05;
x_min = 0;
x_max = 1;
y_min = 0;
y_max = 1;

figure(2);
set(gcf, 'Units', 'Inches', 'Position', [3 3 5.2 5]);

for ii = unit: unit: 1 - unit

    for jj = unit: unit: 1 - unit

        [T, Y] = ode23tb('Differential_Calculus_Extended', [0, 3], [ii, jj]);

        plot(Y(:,1), Y(:,2), 'Color', 'blue');

        hold on;

    end

end

end

% [A, B] = Equilibrium_Calc();
%
% scatter(A, B, 5, 'filled', 'red');
%
% hold on;

set(gca, 'FontSize', 14, 'FontName', 'Cambria');
set(gca, 'FontSize', 14, 'FontName', 'Times New Roman');

xlabel('x', 'FontSize', 16, 'FontWeight', 'light', 'FontName', 'Times New Roman

```

```
Italic');  
ylabel('y','FontSize', 16, 'FontWeight', 'light', 'FontName', 'Times New Roman  
Italic');  
  
xlim([x_min, x_max]);  
ylim([y_min, y_max]);  
  
xticks(0: x_max / 5 :x_max);  
yticks(0: y_max / 5 :y_max);  
  
grid on;
```
